# Supplementary material for: The Trace Element Composition of Size Fractionated Suspended Particulate Matter Samples from the Qatari EEZ of the Arabian Gulf: The Role of Atmospheric Dust
Source: Copernicus journal article supplement (doi:10.5194/bg-2019-183), 2019-05-17
Supplement: Supplementary file 1 [file bg-2019-183-supplement.pdf]

## Supplemental Materials:

**Table S1 (next three pages):** Data for the trace element composition of plankton from the *2012 cruise*. The upper segment shows results for bulk plankton (small-size fraction) collected with a 50  $\mu\text{m}$  net tow. The lower segment shows data for the larger plankton (large-size fraction) collected with a 200  $\mu\text{m}$  net tow. The 'CUMULATIVE' row is an average of both of these size fractions. The distance column gives the shortest distance from land to each sampling location (in kilometers). The letters (R), (L), and (E) represent the raw data, the lithogenic correction (in this case with average Qatari dust), and the excess concentrations, respectively. All are measured in parts per million (ppm), or  $\mu\text{g/g}$ . Aluminum only has a raw data column because of the entire Al in each sample was assumed to be of lithogenic origin, meaning that the lithogenic correction would be zero. The number in scientific notation in parenthesis adjacent to the (L) column is a numerical representation of the [Me]/Al ratio found in Qatari dust (Yigiterhan et al., 2018) used to determine the lithogenic correction. Certain elements have excess values, which are negative, indicating that there was an overcorrection for the lithogenic portion of the sample.

| Sample #          | Location            | Distance (km) | Measurement          | Al       | As       | As                  | As       | Ba       | Ba                  | Ba       | Cd       | Cd                  | Cd       |
|-------------------|---------------------|---------------|----------------------|----------|----------|---------------------|----------|----------|---------------------|----------|----------|---------------------|----------|
|                   |                     |               |                      | <i>R</i> | <i>R</i> | <i>L (9.90E-05)</i> | <i>E</i> | <i>R</i> | <i>L (7.32E-03)</i> | <i>E</i> | <i>R</i> | <i>L (8.29E-06)</i> | <i>E</i> |
| 1                 | Doha                | 10.19         | Bulk (50 µm)         | 2,590    | 31.4     | 0.257               | 31.2     | 14.1     | 19.0                | -4.92    | 0.52     | 0.02                | 0.50     |
| 2                 | Khor Al-Odaid       | 0.23          | Bulk (50 µm)         | 994      | 13.2     | 0.098               | 13.1     | 5.69     | 7.27                | -1.59    | 1.01     | 0.01                | 1.00     |
| 3                 | Mesaieed            | 0.60          | Bulk (50 µm)         | 3,010    | 8.58     | 0.298               | 8.28     | 17.9     | 22.1                | -4.11    | 0.64     | 0.025               | 0.62     |
| 4                 | Shraawoo            | 59.60         | Bulk (50 µm)         | 1,940    | 13.9     | 0.192               | 13.7     | 14.7     | 14.2                | 0.48     | 1.11     | 0.016               | 1.09     |
| 5                 | Al-Edd Al-Gharbi    | 46.55         | Bulk (50 µm)         | 480      | 6.57     | 0.048               | 6.52     | 53.4     | 3.52                | 49.8     | 0.81     | 0.004               | 0.81     |
| 6                 | Ash Shargi Oilfield | 78.90         | Bulk (50 µm)         | 1,830    | 9.19     | 0.181               | 9.00     | 26.8     | 13.4                | 13.4     | 2.71     | 0.015               | 2.70     |
| 7                 | Halul Island        | 84.05         | Bulk (50 µm)         | 1,030    | 10.9     | 0.102               | 10.8     | 12.4     | 7.51                | 4.88     | 3.59     | 0.009               | 3.58     |
| 8                 | High North          | 74.55         | Bulk (50 µm)         | 1,180    | 12.2     | 0.117               | 12.1     | 6.63     | 8.65                | -2.02    | 2.03     | 0.010               | 2.02     |
| 9                 | Ras Laffan          | 11.40         | Bulk (50 µm)         | 803      | 16.1     | 0.080               | 16.1     | 5.55     | 5.88                | -0.33    | 1.56     | 0.007               | 1.56     |
| 10                | Dukhan              | 0.02          | Bulk (50 µm)         | 10,500   | 28.5     | 1.040               | 27.5     | 69.5     | 77.0                | -7.49    | 0.36     | 0.087               | 0.27     |
| 11                | Umm Bab             | 0.48          | Bulk (50 µm)         | 7,230    | 19.3     | 0.716               | 18.6     | 42.5     | 52.9                | -10.4    | 0.55     | 0.060               | 0.49     |
| <b>AVERAGE</b>    |                     |               |                      | 2,870    | 15.4     | 0.285               | 15.2     | 24.5     | 21.0                | 3.42     | 1.35     | 0.024               | 1.33     |
|                   |                     |               |                      |          |          |                     |          |          |                     |          |          |                     |          |
|                   |                     |               |                      | <i>R</i> | <i>R</i> | <i>L (9.90E-05)</i> | <i>E</i> | <i>R</i> | <i>L (7.32E-03)</i> | <i>E</i> | <i>R</i> | <i>L (8.29E-06)</i> | <i>E</i> |
| 12                | Doha                | 10.19         | Zooplankton (200 µm) | 3,250    | 17.9     | 0.322               | 17.6     | 16.9     | 23.8                | -6.86    | 0.70     | 0.027               | 0.68     |
| 13                | Khor Al-Odaid       | 0.23          | Zooplankton (200 µm) | 1,010    | 8.36     | 0.100               | 8.26     | 6.07     | 7.40                | -1.34    | 1.17     | 0.008               | 1.17     |
| 14                | Mesaieed            | 0.60          | Zooplankton (200 µm) | 2,770    | 7.64     | 0.275               | 7.37     | 11.8     | 20.3                | -8.54    | 0.63     | 0.023               | 0.60     |
| 15                | Shraawoo            | 59.60         | Zooplankton (200 µm) | 722      | 10.7     | 0.072               | 10.6     | 4.77     | 5.28                | -0.52    | 0.78     | 0.006               | 0.78     |
| 16                | Al-Edd Al-Gharbi    | 46.55         | Zooplankton (200 µm) | 641      | 9.22     | 0.064               | 9.15     | 114      | 4.69                | 110      | 0.10     | 0.005               | 0.99     |
| 17                | Ash Shargi Oilfield | 78.90         | Zooplankton (200 µm) | 560      | 7.76     | 0.055               | 7.71     | 15.6     | 4.09                | 11.5     | 2.07     | 0.005               | 2.06     |
| 18                | Halul Island        | 84.05         | Zooplankton (200 µm) | 335      | 12.1     | 0.033               | 12.1     | 12.8     | 2.45                | 10.3     | 2.74     | 0.003               | 2.74     |
| 19                | High North          | 74.55         | Zooplankton (200 µm) | 1,020    | 14.5     | 0.101               | 14.4     | 6.68     | 7.46                | -0.78    | 2.27     | 0.008               | 2.26     |
| 20                | Ras Laffan          | 11.40         | Zooplankton (200 µm) | 418      | 19.4     | 0.041               | 19.4     | 2.78     | 3.06                | -0.28    | 1.77     | 0.003               | 1.76     |
| 21                | Dukhan              | 0.02          | Zooplankton (200 µm) | 5,560    | 19.5     | 0.551               | 19.0     | 37.6     | 40.7                | -3.12    | 0.59     | 0.046               | 0.54     |
| 22                | Umm Bab             | 0.48          | Zooplankton (200 µm) | 1,870    | 9.46     | 0.185               | 9.27     | 17.5     | 13.7                | 3.83     | 0.43     | 0.016               | 0.42     |
| <b>AVERAGE</b>    |                     |               |                      | 1,650    | 12.4     | 0.164               | 12.2     | 22.4     | 12.1                | 10.3     | 1.29     | 0.014               | 1.27     |
|                   |                     |               |                      |          |          |                     |          |          |                     |          |          |                     |          |
| <b>CUMULATIVE</b> |                     |               |                      | 2,260    | 13.9     | 0.224               | 13.7     | 23.4     | 16.6                | 6.88     | 1.32     | 0.019               | 1.30     |

| Sample #          | Co          | Co                  | Co           | Cr          | Cr                  | Cr          | Cu          | Cu                  | Cu          | Fe           | Fe                  | Fe          | Mn          | Mn                  | Mn          |
|-------------------|-------------|---------------------|--------------|-------------|---------------------|-------------|-------------|---------------------|-------------|--------------|---------------------|-------------|-------------|---------------------|-------------|
|                   | <i>R</i>    | <i>L (2.58E-04)</i> | <i>E</i>     | <i>R</i>    | <i>L (2.50E-03)</i> | <i>E</i>    | <i>R</i>    | <i>L (1.17E-03)</i> | <i>E</i>    | <i>R</i>     | <i>L (5.34E-01)</i> | <i>E</i>    | <i>R</i>    | <i>L (1.01E-02)</i> | <i>E</i>    |
| <b>1</b>          | 1.18        | 0.669               | 0.512        | 6.31        | 6.49                | -0.18       | 9.28        | 3.04                | 6.24        | 1,360        | 1,380               | -24.3       | 26.3        | 26.3                | -0.02       |
| <b>2</b>          | 1.00        | 0.256               | 0.746        | 3.72        | 2.49                | 1.23        | 10.4        | 1.17                | 9.21        | 793          | 530                 | 263         | 52.2        | 10.1                | 42.1        |
| <b>3</b>          | 1.14        | 0.777               | 0.366        | 11.6        | 7.54                | 4.05        | 184         | 3.54                | 180         | 2,200        | 1,610               | 592         | 50.1        | 30.5                | 19.5        |
| <b>4</b>          | 0.96        | 0.501               | 0.459        | 5.21        | 4.86                | 0.35        | 82.3        | 2.28                | 80.1        | 1,020        | 1,040               | -14.0       | 35.5        | 19.7                | 15.8        |
| <b>5</b>          | 0.52        | 0.124               | 0.394        | 1.20        | 1.20                | -0.005      | 10.8        | 0.56                | 10.2        | 239          | 256                 | -17.3       | 13.2        | 4.87                | 8.32        |
| <b>6</b>          | 0.96        | 0.472               | 0.483        | 6.40        | 4.58                | 1.82        | 41.4        | 2.15                | 39.3        | 977          | 977                 | 0.79        | 31.7        | 18.5                | 13.1        |
| <b>7</b>          | 1.02        | 0.265               | 0.756        | 8.51        | 2.57                | 5.94        | 13.9        | 1.21                | 12.7        | 437          | 548                 | -111        | 16.0        | 10.4                | 5.59        |
| <b>8</b>          | 0.88        | 0.305               | 0.574        | 3.71        | 2.96                | 0.75        | 11.2        | 1.39                | 9.83        | 526          | 631                 | -105        | 21.5        | 12.0                | 9.49        |
| <b>9</b>          | 0.52        | 0.207               | 0.310        | 4.00        | 2.01                | 1.99        | 56.9        | 0.94                | 56.0        | 445          | 429                 | 16.6        | 12.8        | 8.14                | 4.64        |
| <b>10</b>         | 3.00        | 2.710               | 0.288        | 24.9        | 26.4                | -1.49       | 11.9        | 12.4                | -0.49       | 5,490        | 5,620               | -123        | 133         | 107                 | 26.1        |
| <b>11</b>         | 2.38        | 1.860               | 0.516        | 17.6        | 18.1                | -0.51       | 12.6        | 8.49                | 4.15        | 3,630        | 3,860               | -229        | 88.6        | 73.3                | 15.3        |
| <b>AVERAGE</b>    | 1.23        | 0.741               | 0.491        | 8.47        | 7.20                | 1.27        | 40.4        | 3.38                | 37.0        | 1,560        | 1,530               | 22.6        | 43.7        | 29.1                | 14.5        |
|                   |             |                     |              |             |                     |             |             |                     |             |              |                     |             |             |                     |             |
|                   | <i>R</i>    | <i>L (2.58E-04)</i> | <i>E</i>     | <i>R</i>    | <i>L (2.50E-03)</i> | <i>E</i>    | <i>R</i>    | <i>L (1.17E-03)</i> | <i>E</i>    | <i>R</i>     | <i>L (5.34E-01)</i> | <i>E</i>    | <i>R</i>    | <i>L (1.01E-02)</i> | <i>E</i>    |
| <b>12</b>         | 1.17        | 0.839               | 0.332        | 8.96        | 8.14                | 0.82        | 12.9        | 3.82                | 9.07        | 1,770        | 1,740               | 34.2        | 37.2        | 33.0                | 4.24        |
| <b>13</b>         | 1.30        | 0.261               | 1.040        | 3.07        | 2.53                | 0.54        | 9.75        | 1.19                | 8.56        | 817          | 540                 | 277         | 75.3        | 10.3                | 65.0        |
| <b>14</b>         | 1.93        | 0.715               | 1.210        | 11.9        | 6.95                | 4.92        | 14.1        | 3.26                | 10.8        | 2,000        | 1,480               | 521         | 57.1        | 28.1                | 29.0        |
| <b>15</b>         | 0.58        | 0.186               | 0.392        | 1.93        | 1.81                | 0.12        | 6.77        | 0.85                | 5.93        | 370          | 385                 | -15.7       | 27.0        | 7.32                | 19.7        |
| <b>16</b>         | 0.68        | 0.165               | 0.511        | 2.40        | 1.61                | 0.79        | 35.5        | 0.75                | 34.8        | 315          | 342                 | -26.9       | 20.3        | 6.50                | 13.8        |
| <b>17</b>         | 0.48        | 0.144               | 0.338        | 2.09        | 1.40                | 0.69        | 48.9        | 0.66                | 48.2        | 262          | 299                 | -36.8       | 15.3        | 5.67                | 9.65        |
| <b>18</b>         | 0.43        | 0.086               | 0.347        | 2.65        | 0.838               | 1.81        | 12.7        | 0.39                | 12.3        | 136          | 179                 | -42.4       | 5.69        | 3.39                | 2.30        |
| <b>19</b>         | 0.70        | 0.263               | 0.438        | 2.61        | 2.55                | 0.06        | 13.1        | 1.20                | 11.9        | 484          | 544                 | -59.9       | 22.5        | 10.3                | 12.1        |
| <b>20</b>         | 0.39        | 0.108               | 0.277        | 3.29        | 1.05                | 2.25        | 14.1        | 0.49                | 13.6        | 222          | 223                 | -1.32       | 7.74        | 4.24                | 3.50        |
| <b>21</b>         | 2.28        | 1.430               | 0.841        | 14.4        | 13.9                | 0.43        | 9.54        | 6.53                | 3.01        | 2,920        | 2,970               | -44.0       | 79.2        | 56.4                | 22.9        |
| <b>22</b>         | 1.39        | 0.481               | 0.907        | 4.62        | 4.67                | -0.05       | 8.75        | 2.19                | 6.56        | 988          | 996                 | -7.35       | 82.5        | 18.9                | 63.6        |
| <b>AVERAGE</b>    | 1.03        | 0.426               | 0.603        | 5.26        | 4.13                | 1.13        | 16.9        | 1.94                | 15.0        | 935          | 881                 | 54.4        | 39.1        | 16.7                | 22.3        |
|                   |             |                     |              |             |                     |             |             |                     |             |              |                     |             |             |                     |             |
| <b>CUMULATIVE</b> | <b>1.13</b> | <b>0.583</b>        | <b>0.547</b> | <b>6.86</b> | <b>5.67</b>         | <b>1.20</b> | <b>28.7</b> | <b>2.66</b>         | <b>26.0</b> | <b>1,250</b> | <b>1,210</b>        | <b>38.5</b> | <b>41.4</b> | <b>22.9</b>         | <b>18.4</b> |

| Sample #          | Mo          | Mo                  | Mo          | Ni          | Ni                  | Ni          | Pb           | Pb                  | Pb           | V           | V                   | V           | Zn          | Zn                  | Zn          |
|-------------------|-------------|---------------------|-------------|-------------|---------------------|-------------|--------------|---------------------|--------------|-------------|---------------------|-------------|-------------|---------------------|-------------|
|                   | <i>R</i>    | <i>L (7.12E-05)</i> | <i>E</i>    | <i>R</i>    | <i>L (1.64E-03)</i> | <i>E</i>    | <i>R</i>     | <i>L (1.73E-04)</i> | <i>E</i>     | <i>R</i>    | <i>L (1.87E-03)</i> | <i>E</i>    | <i>R</i>    | <i>L (4.05E-03)</i> | <i>E</i>    |
| <b>1</b>          | 117         | 0.185               | 117         | 5.99        | 4.26                | 1.73        | 0.700        | 0.449               | 0.251        | 4.59        | 4.84                | -0.25       | 25.5        | 10.5                | 15.0        |
| <b>2</b>          | 2.59        | 0.071               | 2.52        | 2.94        | 1.63                | 1.31        | 0.339        | 0.172               | 0.167        | 26.7        | 1.86                | 24.9        | 78.9        | 4.03                | 74.9        |
| <b>3</b>          | 9.26        | 0.214               | 9.04        | 7.71        | 4.95                | 2.76        | 3.010        | 0.522               | 2.490        | 18.7        | 5.63                | 13.1        | 185         | 12.2                | 172         |
| <b>4</b>          | 17.6        | 0.138               | 17.4        | 4.77        | 3.19                | 1.58        | 0.497        | 0.337               | 0.160        | 6.62        | 3.63                | 2.99        | 89.8        | 7.87                | 82.0        |
| <b>5</b>          | 0.00        | 0.034               | -0.03       | 1.17        | 0.79                | 0.38        | 0.333        | 0.083               | 0.250        | 1.27        | 0.897               | 0.37        | 24.5        | 1.95                | 22.6        |
| <b>6</b>          | 0.31        | 0.130               | 0.18        | 5.27        | 3.01                | 2.26        | 0.801        | 0.317               | 0.484        | 5.27        | 3.42                | 1.85        | 68.7        | 7.42                | 61.3        |
| <b>7</b>          | 0.27        | 0.073               | 0.19        | 5.20        | 1.69                | 3.51        | 0.185        | 0.178               | 0.007        | 2.05        | 1.92                | 0.13        | 73.7        | 4.16                | 69.6        |
| <b>8</b>          | 0.00        | 0.084               | -0.08       | 4.26        | 1.94                | 2.32        | 0.310        | 0.205               | 0.105        | 1.97        | 2.21                | -0.24       | 36.6        | 4.79                | 31.8        |
| <b>9</b>          | 0.34        | 0.057               | 0.28        | 3.12        | 1.32                | 1.80        | 0.801        | 0.139               | 0.662        | 2.08        | 1.50                | 0.58        | 98.8        | 3.26                | 95.5        |
| <b>10</b>         | 0.18        | 0.749               | -0.57       | 21.1        | 17.3                | 3.77        | 3.030        | 1.820               | 1.200        | 27.3        | 19.7                | 7.66        | 48.5        | 42.7                | 5.82        |
| <b>11</b>         | 0.32        | 0.514               | -0.20       | 14.1        | 11.9                | 2.23        | 2.120        | 1.250               | 0.865        | 19.3        | 13.5                | 5.78        | 41.7        | 29.3                | 12.4        |
| <b>AVERAGE</b>    | 13.4        | 0.205               | 13.2        | 6.87        | 4.72                | 2.15        | 1.100        | 0.498               | 0.604        | 10.5        | 5.37                | 5.17        | 70.1        | 11.6                | 58.5        |
|                   |             |                     |             |             |                     |             |              |                     |              |             |                     |             |             |                     |             |
|                   | <i>R</i>    | <i>L (7.12E-05)</i> | <i>E</i>    | <i>R</i>    | <i>L (1.64E-03)</i> | <i>E</i>    | <i>R</i>     | <i>L (1.73E-04)</i> | <i>E</i>     | <i>R</i>    | <i>L (1.87E-03)</i> | <i>E</i>    | <i>R</i>    | <i>L (4.05E-03)</i> | <i>E</i>    |
| <b>12</b>         | 66.1        | 0.232               | 65.9        | 7.30        | 5.35                | 1.96        | 1.150        | 0.563               | 0.582        | 6.50        | 6.08                | 0.42        | 49.2        | 13.2                | 36.0        |
| <b>13</b>         | 2.98        | 0.072               | 2.90        | 3.15        | 1.66                | 1.49        | 0.183        | 0.175               | 0.008        | 10.5        | 1.89                | 8.58        | 90.1        | 4.10                | 86.0        |
| <b>14</b>         | 17.6        | 0.197               | 17.4        | 7.57        | 4.56                | 3.01        | 2.030        | 0.481               | 1.55         | 9.69        | 5.18                | 4.51        | 74.6        | 11.2                | 63.3        |
| <b>15</b>         | 17.7        | 0.051               | 17.7        | 1.73        | 1.19                | 0.54        | 0.161        | 0.125               | 0.036        | 2.99        | 1.35                | 1.64        | 42.3        | 2.93                | 39.3        |
| <b>16</b>         | 0.00        | 0.046               | -0.05       | 1.58        | 1.05                | 0.52        | 0.564        | 0.111               | 0.453        | 1.80        | 1.20                | 0.60        | 46.7        | 2.60                | 44.1        |
| <b>17</b>         | 0.00        | 0.039               | -0.04       | 1.55        | 0.92                | 0.63        | 0.000        | 0.097               | -0.097       | 1.88        | 1.04                | 0.84        | 61.7        | 2.27                | 59.5        |
| <b>18</b>         | 0.10        | 0.024               | 0.08        | 2.03        | 0.55                | 1.48        | 0.137        | 0.058               | 0.079        | 0.91        | 0.63                | 0.28        | 64.9        | 1.36                | 63.6        |
| <b>19</b>         | 0.00        | 0.073               | -0.07       | 3.90        | 1.67                | 2.23        | 0.565        | 0.177               | 0.388        | 2.17        | 1.90                | 0.27        | 45.9        | 4.13                | 41.8        |
| <b>20</b>         | 0.98        | 0.030               | 0.95        | 2.80        | 0.69                | 2.11        | 0.000        | 0.073               | -0.073       | 1.22        | 0.78                | 0.44        | 80.6        | 1.70                | 78.9        |
| <b>21</b>         | 0.00        | 0.396               | -0.40       | 11.6        | 9.14                | 2.46        | 1.580        | 0.963               | 0.621        | 14.7        | 10.4                | 4.29        | 67.3        | 22.5                | 44.8        |
| <b>22</b>         | 0.00        | 0.133               | -0.13       | 3.98        | 3.07                | 0.92        | 0.892        | 0.323               | 0.569        | 5.30        | 3.48                | 1.82        | 41.8        | 7.56                | 34.2        |
| <b>AVERAGE</b>    | 9.60        | 0.118               | 9.48        | 4.29        | 2.71                | 1.58        | 0.660        | 0.286               | 0.374        | 5.24        | 3.08                | 2.15        | 60.5        | 6.69                | 53.8        |
|                   |             |                     |             |             |                     |             |              |                     |              |             |                     |             |             |                     |             |
| <b>CUMULATIVE</b> | <b>11.5</b> | <b>0.161</b>        | <b>11.4</b> | <b>5.58</b> | <b>3.72</b>         | <b>1.86</b> | <b>0.881</b> | <b>0.392</b>        | <b>0.489</b> | <b>7.89</b> | <b>4.23</b>         | <b>3.66</b> | <b>65.3</b> | <b>9.17</b>         | <b>56.1</b> |

**Table S2 (next three pages):** Data for the trace element composition of plankton from the *2014 cruise*. The upper segment shows results for bulk plankton (small-size fraction) collected with a 50  $\mu\text{m}$  net tow. The lower segment shows data for the larger plankton (large-size fraction) collected with a 200  $\mu\text{m}$  net tow. The ‘CUMULATIVE’ row is an average of both of these measurements. The distance column is a calculation of the shortest distance from land to each sampling location (in kilometers). The letters (R), (L), and (E) represent the values for raw data, the lithogenic correction (using average Qatar dust), and the excess concentrations, respectively. All are measured in parts per million (ppm), or  $\mu\text{g/g}$ . Aluminum only has a raw data column because all of the aluminum in each sample was assumed to be of lithogenic origin, meaning that the lithogenic correction would be zero. The number in scientific notation in parenthesis adjacent to the (L) column is a numerical representation of the [Me]/Al ratio found in average Qatari dust (Table 1 and Yigiterhan et al., 2018) used to determine the lithogenic correction. Certain elements have excess values, which are negative, indicating that there was an overcorrection for the lithogenic portion of the sample.

| Sample            | Location | Distance (km) | Measurement          | Al           | As          | As                  | As          | Ba          | Ba                  | Ba           | Cd           | Cd                  | Cd           |
|-------------------|----------|---------------|----------------------|--------------|-------------|---------------------|-------------|-------------|---------------------|--------------|--------------|---------------------|--------------|
|                   |          |               |                      | <i>R</i>     | <i>R</i>    | <i>L (9.90E-05)</i> | <i>E</i>    | <i>R</i>    | <i>L (7.32E-03)</i> | <i>E</i>     | <i>R</i>     | <i>L (8.29E-06)</i> | <i>E</i>     |
| 23                | Dukhan   | 8.77          | Bulk (50 µm)         | 4,190        | 8.72        | 0.415               | 8.31        | 22.9        | 30.6                | -7.78        | 0.836        | 0.035               | 0.801        |
| 24                | Dukhan   | 8.77          | Bulk (50 µm)         | 4,070        | 8.07        | 0.403               | 7.67        | 21.0        | 29.8                | -8.80        | 0.758        | 0.034               | 0.724        |
| 25                | Dukhan   | 6.78          | Bulk (50 µm)         | 3,950        | 9.72        | 0.392               | 9.32        | 22.1        | 28.9                | -6.81        | 0.788        | 0.039               | 0.755        |
| 26                | Dukhan   | 6.78          | Bulk (50 µm)         | 4,110        | 9.51        | 0.408               | 9.11        | 21.2        | 30.1                | -8.95        | 0.795        | 0.034               | 0.761        |
| 27                | Dukhan   | 1.31          | Bulk (50 µm)         | 8,480        | 14.9        | 0.840               | 14.0        | 43.5        | 62.1                | -18.6        | 0.190        | 0.070               | 0.119        |
| 28                | Dukhan   | 1.31          | Bulk (50 µm)         | 8,330        | 14.0        | 0.825               | 13.2        | 40.9        | 61.0                | -20.0        | 0.191        | 0.069               | 0.122        |
| 29                | Doha     | 6.54          | Bulk (50 µm)         | 4,400        | 3.87        | 0.436               | 3.43        | 28.6        | 32.2                | -3.61        | 0.261        | 0.037               | 0.225        |
| 30                | Doha     | 2.20          | Bulk (50 µm)         | 3,380        | 2.04        | 0.335               | 1.71        | 13.0        | 24.7                | -11.8        | 0.082        | 0.028               | 0.054        |
| 31                | Doha     | 2.20          | Bulk (50 µm)         | 3,150        | 1.97        | 0.312               | 1.66        | 12.1        | 23.1                | -11.0        | 0.091        | 0.026               | 0.065        |
| 32                | Doha     | 0.06          | Bulk (50 µm)         | 14,400       | 4.43        | 1.420               | 3.01        | 65.6        | 105                 | -39.6        | 0.115        | 0.119               | -0.004       |
| 33                | Doha     | 0.06          | Bulk (50 µm)         | 14,600       | 4.66        | 1.450               | 3.21        | 73.4        | 107                 | -33.6        | 0.093        | 0.121               | -0.028       |
| <b>AVERAGE</b>    |          |               |                      | <b>6,640</b> | <b>7.44</b> | <b>0.658</b>        | <b>6.79</b> | <b>33.1</b> | <b>48.6</b>         | <b>-15.5</b> | <b>0.382</b> | <b>0.055</b>        | <b>0.327</b> |
|                   |          |               |                      |              |             |                     |             |             |                     |              |              |                     |              |
|                   |          |               |                      | <i>R</i>     | <i>R</i>    | <i>L (9.90E-05)</i> | <i>E</i>    | <i>R</i>    | <i>L (7.32E-03)</i> | <i>E</i>     | <i>R</i>     | <i>L (8.29E-06)</i> | <i>E</i>     |
| 34                | Dukhan   | 8.77          | Zooplankton (200 µm) | 2,050        | 7.04        | 0.203               | 6.83        | 14.1        | 15.0                | -0.90        | 0.766        | 0.017               | 0.749        |
| 35                | Dukhan   | 6.78          | Zooplankton (200 µm) | 4,450        | 5.83        | 0.441               | 5.39        | 78.4        | 32.6                | 45.8         | 0.290        | 0.037               | 0.253        |
| 36                | Dukhan   | 1.31          | Zooplankton (200 µm) | 4,190        | 5.17        | 0.415               | 4.76        | 33.9        | 30.7                | 3.19         | 0.122        | 0.035               | 0.087        |
| 37                | Doha     | 2.20          | Zooplankton (200 µm) | 7,630        | 2.45        | 0.756               | 1.69        | 40.9        | 55.9                | -15.0        | 0.365        | 0.063               | 0.302        |
| 38                | Doha     | 6.54          | Zooplankton (200 µm) | 3,730        | 4.10        | 0.369               | 3.73        | 22.0        | 27.3                | -5.28        | 0.621        | 0.031               | 0.590        |
| 39                | Doha     | 0.06          | Zooplankton (200 µm) | 5,750        | 5.10        | 0.570               | 4.53        | 24.6        | 42.1                | -17.5        | 0.314        | 0.048               | 0.267        |
| 40                | Doha     | 0.06          | Zooplankton (200 µm) | 5,260        | 4.62        | 0.521               | 4.10        | 25.1        | 38.5                | -13.5        | 0.337        | 0.044               | 0.293        |
| <b>AVERAGE</b>    |          |               |                      | <b>4,720</b> | <b>4.90</b> | <b>0.468</b>        | <b>4.43</b> | <b>34.1</b> | <b>34.6</b>         | <b>-0.45</b> | <b>0.402</b> | <b>0.039</b>        | <b>0.363</b> |
|                   |          |               |                      |              |             |                     |             |             |                     |              |              |                     |              |
| <b>CUMULATIVE</b> |          |               |                      | <b>5,900</b> | <b>6.46</b> | <b>0.584</b>        | <b>5.87</b> | <b>33.5</b> | <b>43.1</b>         | <b>-9.64</b> | <b>0.390</b> | <b>0.049</b>        | <b>0.341</b> |

| Sample            | Co          | Co                  | Co          | Cr          | Cr                  | Cr          | Cu          | Cu                  | Cu          | Fe           | Fe                  | Fe         | Mn          | Mn                  | Mn           |
|-------------------|-------------|---------------------|-------------|-------------|---------------------|-------------|-------------|---------------------|-------------|--------------|---------------------|------------|-------------|---------------------|--------------|
|                   | <i>R</i>    | <i>L (2.58E-04)</i> | <i>E</i>    | <i>R</i>    | <i>L (2.50E-03)</i> | <i>E</i>    | <i>R</i>    | <i>L (1.17E-03)</i> | <i>E</i>    | <i>R</i>     | <i>L (5.34E-01)</i> | <i>E</i>   | <i>R</i>    | <i>L (1.01E-02)</i> | <i>E</i>     |
| <b>23</b>         | 1.84        | 1.08                | 0.76        | 9.86        | 10.5                | -0.62       | 28.4        | 4.92                | 23.4        | 2,520        | 2,230               | 288        | 45.7        | 42.4                | 3.24         |
| <b>24</b>         | 1.70        | 1.05                | 0.65        | 10.3        | 10.2                | 0.08        | 43.6        | 4.78                | 38.9        | 2,190        | 2,170               | 22         | 42.5        | 41.3                | 1.27         |
| <b>25</b>         | 1.69        | 1.02                | 0.67        | 8.76        | 9.90                | -1.15       | 65.3        | 4.7                 | 60.7        | 2,300        | 2,110               | 194        | 43.6        | 40.1                | 3.51         |
| <b>26</b>         | 1.67        | 1.06                | 0.60        | 8.92        | 10.3                | -1.38       | 65.1        | 4.83                | 60.3        | 2,110        | 2,200               | -82        | 42.6        | 41.7                | 0.90         |
| <b>27</b>         | 2.68        | 2.19                | 0.49        | 17.1        | 21.2                | -4.11       | 17.2        | 9.96                | 7.27        | 4,430        | 4,530               | -92        | 70.9        | 86.0                | -15.1        |
| <b>28</b>         | 2.56        | 2.15                | 0.41        | 16.3        | 20.9                | -4.54       | 26.1        | 9.78                | 16.3        | 4,080        | 4,450               | -364       | 66.0        | 84.4                | -18.4        |
| <b>29</b>         | 1.78        | 1.13                | 0.65        | 15.0        | 11.0                | 3.94        | 311         | 5.17                | 306         | 2,600        | 2,350               | 255        | 40.1        | 44.6                | -4.48        |
| <b>30</b>         | 1.44        | 0.87                | 0.57        | 9.43        | 8.46                | 0.97        | 26.1        | 3.97                | 22.2        | 1,810        | 1,800               | 2.7        | 24.3        | 34.2                | -9.96        |
| <b>31</b>         | 1.38        | 0.81                | 0.57        | 8.31        | 7.90                | 0.41        | 63.5        | 3.71                | 59.8        | 1,700        | 1,680               | 15         | 22.5        | 32.0                | -9.46        |
| <b>32</b>         | 3.74        | 3.71                | 0.03        | 42.9        | 36.0                | 6.89        | 37.8        | 16.9                | 20.9        | 7,020        | 7,670               | -648       | 147         | 146                 | 1.77         |
| <b>33</b>         | 3.97        | 3.77                | 0.20        | 45.1        | 36.6                | 8.52        | 34.0        | 17.2                | 16.9        | 7,390        | 7,800               | -412       | 153         | 148                 | 4.90         |
| <b>AVERAGE</b>    | <b>2.22</b> | <b>1.71</b>         | <b>0.51</b> | <b>17.4</b> | <b>16.6</b>         | <b>0.82</b> | <b>65.3</b> | <b>7.80</b>         | <b>57.5</b> | <b>3,470</b> | <b>3,540</b>        | <b>-75</b> | <b>63.5</b> | <b>67.3</b>         | <b>-3.80</b> |
|                   |             |                     |             |             |                     |             |             |                     |             |              |                     |            |             |                     |              |
|                   | <i>R</i>    | <i>L (2.58E-04)</i> | <i>E</i>    | <i>R</i>    | <i>L (2.50E-03)</i> | <i>E</i>    | <i>R</i>    | <i>L (1.17E-03)</i> | <i>E</i>    | <i>R</i>     | <i>L (5.34E-01)</i> | <i>E</i>   | <i>R</i>    | <i>L (1.01E-02)</i> | <i>E</i>     |
| <b>34</b>         | 2.45        | 0.53                | 1.92        | -27.2       | 5.14                | -32.4       | 31.9        | 2.41                | 29.5        | 1,760        | 1,100               | 661        | 45.8        | 20.8                | 25.0         |
| <b>35</b>         | 1.75        | 1.15                | 0.60        | 17.5        | 11.1                | 6.34        | 6.87        | 5.22                | 1.65        | 3,280        | 2,370               | 902        | 83.4        | 45.1                | 38.3         |
| <b>36</b>         | 2.15        | 1.08                | 1.07        | 12.6        | 10.5                | 2.08        | 125         | 4.92                | 120         | 3,300        | 2,240               | 1060       | 70.3        | 42.5                | 27.8         |
| <b>37</b>         | 4.25        | 1.97                | 2.28        | 44.4        | 19.1                | 25.2        | 28.0        | 8.97                | 19.1        | 5,930        | 4,070               | 1860       | 184         | 77.4                | 107          |
| <b>38</b>         | 1.79        | 0.96                | 0.82        | 12.7        | 9.3                 | 3.39        | 368         | 4.38                | 363         | 2,870        | 1,990               | 884        | 45.6        | 37.8                | 7.78         |
| <b>39</b>         | 4.50        | 1.48                | 3.02        | 25.1        | 14.4                | 10.7        | 26.8        | 6.76                | 20.1        | 3,540        | 3,070               | 467        | 494         | 58.3                | 436          |
| <b>40</b>         | 4.18        | 1.36                | 2.82        | 22.2        | 13.2                | 9.03        | 32.2        | 6.18                | 26.0        | 3,330        | 2,810               | 523        | 471         | 53.3                | 417          |
| <b>AVERAGE</b>    | <b>3.01</b> | <b>1.22</b>         | <b>1.79</b> | <b>15.3</b> | <b>11.8</b>         | <b>3.49</b> | <b>88.3</b> | <b>5.55</b>         | <b>82.8</b> | <b>3,430</b> | <b>2,520</b>        | <b>908</b> | <b>199</b>  | <b>47.9</b>         | <b>151</b>   |
|                   |             |                     |             |             |                     |             |             |                     |             |              |                     |            |             |                     |              |
| <b>CUMULATIVE</b> | <b>2.53</b> | <b>1.52</b>         | <b>1.01</b> | <b>16.6</b> | <b>14.8</b>         | <b>1.86</b> | <b>74.3</b> | <b>6.93</b>         | <b>67.3</b> | <b>3,450</b> | <b>3,150</b>        | <b>308</b> | <b>116</b>  | <b>59.8</b>         | <b>56.5</b>  |

| Sample            | Mo            | Mo                  | Mo            | Ni          | Ni                  | Ni          | Pb          | Pb                  | Pb          | V           | V                   | V           | Zn          | Zn                  | Zn          |
|-------------------|---------------|---------------------|---------------|-------------|---------------------|-------------|-------------|---------------------|-------------|-------------|---------------------|-------------|-------------|---------------------|-------------|
|                   | <i>R</i>      | <i>L (7.12E-05)</i> | <i>E</i>      | <i>R</i>    | <i>L (1.64E-03)</i> | <i>E</i>    | <i>R</i>    | <i>L (1.73E-04)</i> | <i>E</i>    | <i>R</i>    | <i>L (1.87E-03)</i> | <i>E</i>    | <i>R</i>    | <i>L (4.05E-03)</i> | <i>E</i>    |
| <b>23</b>         | 0.271         | 0.298               | -0.027        | 10.2        | 6.88                | 3.29        | 1.55        | 0.73                | 0.83        | 17.8        | 7.82                | 9.96        | 111         | 17.0                | 94.1        |
| <b>24</b>         | 0.292         | 0.290               | 0.002         | 9.27        | 6.69                | 2.58        | 1.05        | 0.71                | 0.34        | 16.1        | 7.60                | 8.54        | 120         | 16.5                | 104         |
| <b>25</b>         | 0.068         | 0.282               | -0.214        | 9.27        | 6.50                | 2.77        | 1.21        | 0.69                | 0.52        | 16.8        | 7.39                | 9.37        | 78.3        | 16.0                | 62.3        |
| <b>26</b>         | 0.216         | 0.293               | -0.077        | 9.14        | 6.76                | 2.38        | 5.53        | 0.71                | 4.82        | 16.6        | 7.69                | 8.96        | 75.3        | 16.7                | 58.7        |
| <b>27</b>         | -0.063        | 0.604               | -0.667        | 16.1        | 13.9                | 2.14        | 2.90        | 1.47                | 1.43        | 21.8        | 15.8                | 6.00        | 30.1        | 34.4                | -4.25       |
| <b>28</b>         | 0.101         | 0.593               | -0.492        | 14.9        | 13.7                | 1.20        | 2.55        | 1.44                | 1.11        | 20.5        | 15.6                | 4.90        | 30.8        | 33.8                | -3.00       |
| <b>29</b>         | 0.481         | 0.313               | 0.168         | 9.67        | 7.23                | 2.44        | 108         | 0.76                | 107         | 11.1        | 8.22                | 2.91        | 147         | 17.8                | 129         |
| <b>30</b>         | -0.111        | 0.240               | -0.352        | 6.46        | 5.55                | 0.91        | 1.55        | 0.59                | 0.96        | 8.58        | 6.31                | 2.27        | 36.2        | 13.7                | 22.5        |
| <b>31</b>         | -0.275        | 0.225               | -0.500        | 6.53        | 5.18                | 1.34        | 2.95        | 0.55                | 2.40        | 8.05        | 5.89                | 2.15        | 54.2        | 12.8                | 41.4        |
| <b>32</b>         | 0.408         | 1.020               | -0.615        | 18.9        | 23.6                | -4.72       | 7.10        | 2.49                | 4.61        | 47.1        | 26.8                | 20.3        | 66.1        | 58.2                | 7.89        |
| <b>33</b>         | 0.400         | 1.040               | -0.641        | 20.7        | 24.0                | -3.35       | 5.28        | 2.53                | 2.75        | 49.7        | 27.3                | 22.4        | 68.4        | 59.2                | 9.20        |
| <b>AVERAGE</b>    | <b>0.162</b>  | <b>0.473</b>        | <b>-0.310</b> | <b>11.9</b> | <b>10.9</b>         | <b>1.00</b> | <b>12.7</b> | <b>1.15</b>         | <b>11.5</b> | <b>21.3</b> | <b>12.4</b>         | <b>8.88</b> | <b>74.4</b> | <b>26.9</b>         | <b>47.4</b> |
|                   |               |                     |               |             |                     |             |             |                     |             |             |                     |             |             |                     |             |
|                   | <i>R</i>      | <i>L (7.12E-05)</i> | <i>E</i>      | <i>R</i>    | <i>L (1.64E-03)</i> | <i>E</i>    | <i>R</i>    | <i>L (1.73E-04)</i> | <i>E</i>    | <i>R</i>    | <i>L (1.87E-03)</i> | <i>E</i>    | <i>R</i>    | <i>L (4.05E-03)</i> | <i>E</i>    |
| <b>34</b>         | -1.67         | 0.146               | -1.820        | 20.9        | 3.38                | 17.5        | 1.07        | 0.36                | 0.55        | 16.8        | 3.84                | 13.0        | 60.4        | 8.33                | 52.1        |
| <b>35</b>         | -1.78         | 0.317               | -2.100        | 16.9        | 7.31                | 9.64        | -0.72       | 0.77                | -1.82       | 49.9        | 8.31                | 41.6        | 35          | 18.0                | 16.9        |
| <b>36</b>         | -1.33         | 0.298               | -1.630        | 14.1        | 6.89                | 7.24        | 26.7        | 0.73                | 25.7        | 14.9        | 7.82                | 7.10        | 140         | 17.0                | 123         |
| <b>37</b>         | -0.114        | 0.543               | -0.657        | 24.3        | 12.5                | 11.7        | 129         | 1.32                | 127         | 32.9        | 14.3                | 18.6        | 134         | 30.9                | 103         |
| <b>38</b>         | -0.795        | 0.265               | -1.060        | 17.2        | 6.13                | 11.1        | 1,770       | 0.65                | 1,770       | 13.5        | 6.96                | 6.54        | 472         | 15.1                | 457         |
| <b>39</b>         | 0.694         | 0.409               | 0.285         | 15.5        | 9.45                | 6.07        | 295         | 1.00                | 293         | 26.6        | 10.7                | 15.8        | 365         | 23.3                | 342         |
| <b>40</b>         | 0.453         | 0.375               | 0.078         | 14.2        | 8.65                | 5.55        | 11.0        | 0.91                | 9.69        | 25.5        | 9.83                | 15.6        | 394         | 21.3                | 373         |
| <b>AVERAGE</b>    | <b>-0.649</b> | <b>0.336</b>        | <b>-0.986</b> | <b>17.6</b> | <b>7.76</b>         | <b>9.82</b> | <b>318</b>  | <b>0.82</b>         | <b>317</b>  | <b>25.7</b> | <b>8.82</b>         | <b>16.9</b> | <b>229</b>  | <b>19.1</b>         | <b>210</b>  |
|                   |               |                     |               |             |                     |             |             |                     |             |             |                     |             |             |                     |             |
| <b>CUMULATIVE</b> | <b>-0.153</b> | <b>0.420</b>        | <b>-0.573</b> | <b>14.1</b> | <b>9.69</b>         | <b>4.43</b> | <b>132</b>  | <b>1.02</b>         | <b>130</b>  | <b>23.0</b> | <b>11.0</b>         | <b>12.0</b> | <b>134</b>  | <b>23.9</b>         | <b>110</b>  |
